# Supplementary material for: Synthesis and self-assembly of giant porphyrin discsElectronic supplementary information (ESI) available: experimental procedures and characterization data, NMR- and UV/Vis-titration data. See http://www.rsc.org/suppdata/cc/b4/b401324g/
Source: Royal Society of Chemistry journal article supplement (doi:10.1039/b401324g), 2004-01-01
Supplement: b401324g.pdf [file b401324g.pdf]

## Supporting information

### Synthesis of **3a**

To a solution of **1** (180 mg, 152  $\mu\text{mol}$ ) in 10 mL of distilled DMF, **2** (10.7 mg, 6.53  $\mu\text{mol}$ ) was added. During 1.5 hrs nitrogen was led through the solution. The solution was heated to 90  $^{\circ}\text{C}$  and potassium carbonate (133 mg, 961  $\mu\text{mol}$ ) was added. The reaction mixture was heated to 130  $^{\circ}\text{C}$  and stirred for 3 days after which the reaction was stopped and the DMF was evaporated. The product was purified by chromatography using a silica column (size 0.035 mm – 0.070 mm, pore size 6 nm, eluent 5% methanol in chloroform) and subsequently by size exclusion column chromatography (eluent dichloromethane). The first fraction was the product. Yield: 0.053 g (3.59  $\mu\text{mol}$ , 55%) of **3a** as a purple solid. Mp 127  $^{\circ}\text{C}$ . MALDI-TOF MS: calculated for  $\text{C}_{1014}\text{H}_{1254}\text{N}_{48}\text{O}_{48}$  14883; found  $m/z = 14896$  g/mol. Elemental analysis: calculated C: 81.83, H: 8.49, N: 4.52; found C: 81.73, H: 8.46, N: 4.65.  $^1\text{H}$ -NMR ( $\text{CDCl}_3$ , 500,13 MHz)  $\delta$  (ppm): 8.75 (bs, 24H, *H17*, *H10*); 8.7 (bs, 24H, *H14*, *H13*); 8.6 (bs, 24H, *H16*, *H15*); 8.4 (bs, 24H, *H12*, *H11*); 8.03 (bs, 6H, *Hc*); 8.0 (bd, 48H, *H9*, *H3*); 7.59 (bs, 12H, *Ha*); 7.4 (bs, 24H, *H7*); 7.2 (bd, 48H, *H8*, *H2*); 7.0 (b, 24H, *H5*); 6.4 (b, 24H, *H6*); 5.9 (b, 24H, *H4*); 5.3 (b, 24H, *Hb*); 4.22 (bt, 24H, *H25*); 3.2 (bt, 24H, *H32*); 2.7 (bt, 24H, *H18*); 1.99 (bq, 24H, *H26*); 1.63 (bm, 24H, *H27*); 1.5-1.0 (b, 192H, *H30*, *H29*, *H28*); 1.5-1.0 (b, 240H, *H37*-*H33*); 1.5-1.0 (b, 240H, *H23*-*H19*); 0.9-0.8 (bt, 36H, *H24*); 0.87 (bt, 36H, *H31*); 0.87 (bt, 36H, *H38*); -2.78 (bs, 24H, *H1*).  $^{13}\text{C}$ -NMR ( $\text{CDCl}_3$ , 75,47 MHz)  $\delta$  (ppm): 136 (*C9*, *C3*); 135 (*C7*); 134 (*C5*); 129.0 (*Cc*); 128.2 (*Ca*); 113 (*C2*); 112.6 (*C8*); 111 (*C6*); 110 (*C4*); 70.6 (*Cb*); 68.3 (*C25*); 67.9 (*C32*); 67.4 (*C18*); 32.0 (*C36*, *C29*, *C22*); 29.8 (*C26*); 29.7 (*C35*, *C28*, *C21*); 26.8 (*C27*); 26.5 (*C33*, *C20*, *C19*); 26 (*C34*); 23.0 (*C37*, *C30*, *C23*); 14.1 (*C38*, *C31*, *C24*). UV-vis ( $\text{CHCl}_3$ )  $\lambda/\text{nm}$ ,  $\log(\epsilon/M^{-1}\text{cm}^{-1})$  423 (6.6), 520 (5.3), 558 (5.2), 595 (4.8), 653 (4.9). Fluorescence emission 655 nm (excitation at 423 nm).

### $^1\text{H}$ -NMR spectrum of **3a** and proton designations

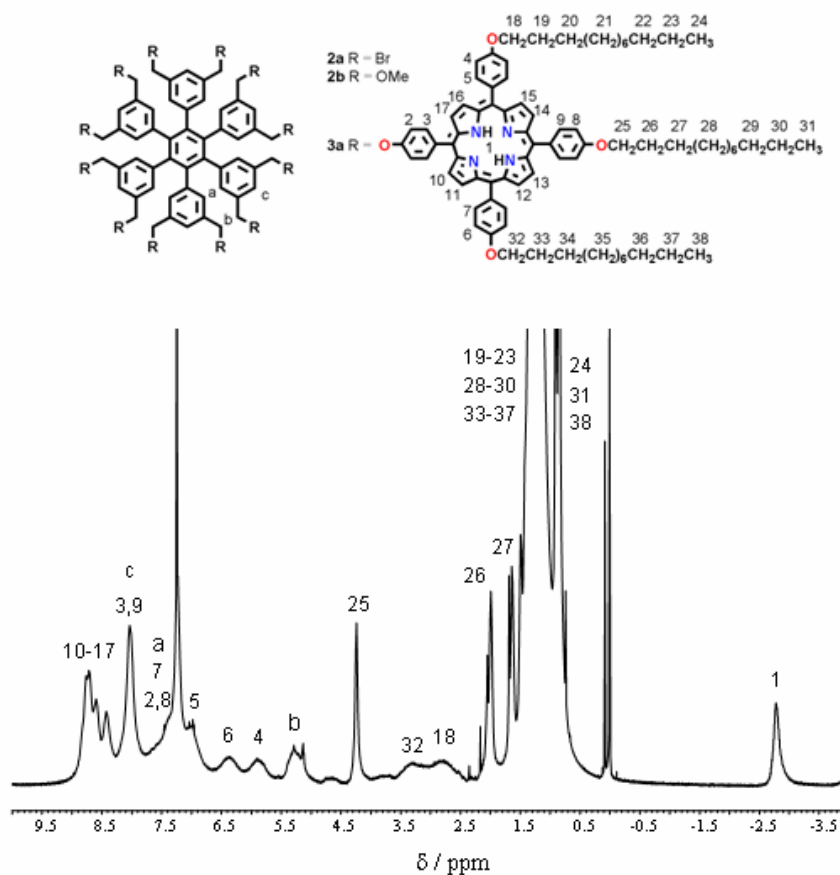

### MALDI-tof spectrum of **3a**

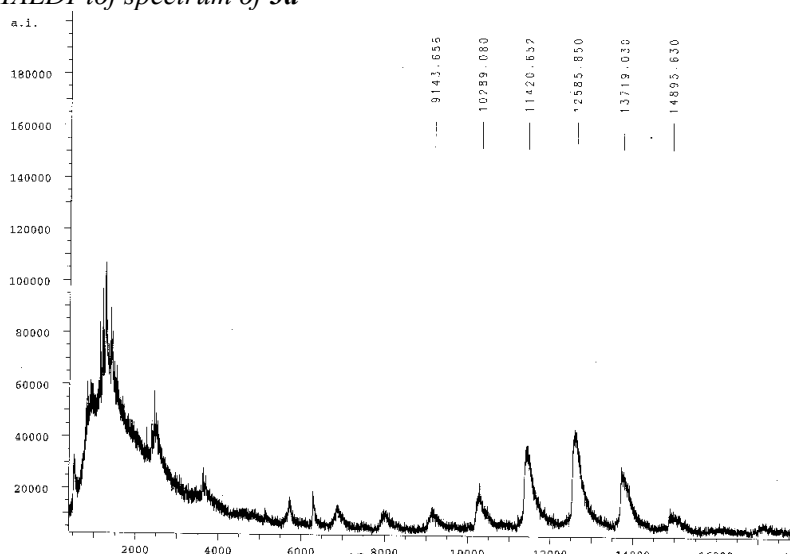

### Synthesis of **3b**

To a solution of **3a** (0.012 g, 0.81  $\mu$ mol) in chloroform (10 mL) and methanol (5 mL) zinc(II) acetate dihydrate (0.017 g, 75.6  $\mu$ mol) was added. The solution was refluxed for 16 hrs. After cooling, the solution was washed with water (3x). The solvent was evaporated and the product was purified on a silica column (size 0.035 mm – 0.070 mm, pore size 6 nm, eluent: 1% methanol, 1% triethylamine in chloroform). Yield: 0.011 g (0.70  $\mu$ mol, 86%) of **3b** as a purple solid. Mp 129 °C. MALDI-TOF MS: calculated for  $C_{1014}H_{1230}N_{48}O_{48}Zn_{12}$  15644; found  $m/z = 15712$  g/mol. Elemental analysis: calculated C: 77.85, H: 7.92, N: 4.30; found C: 77.68, H: 8.22, N: 4.16.  $^1H$ -NMR ( $CDCl_3$ , 300,13 MHz)  $\delta$  (ppm): 8.7 (bs, 48H, *H17*, *H10*, *H14*, *H13*); 8.6 (bs, 24H, *H16*, *H15*); 8.4 (bs, 24H, *H12*, *H11*); 7.99 (bs, 6H, *Hc*); 7.97 (bd, 48H, *H9*, *H3*); 7.62 (bs, 12H, *Ha*); 7.51 (bs, 24H, *H7*); 7.23 (bd, 24H, *H2*); 7.22 (bd, 24H, *H8*); 7.16 (b, 24H, *H5*); 6.5 (b, 24H, *H6*); 6.1 (b, 24H, *H4*); 5.3 (b, 24H, *Hb*); 4.24 (bt, 24H, *H25*); 3.4 (bt, 24H, *H32*); 3.0 (bt, 24H, *H18*); 1.98 (bq, 24H, *H26*); 1.67 (bm, 24H, *H27*); 1.5-1.0 (b, 192H, *H30*, *H29*, *H28*); 1.5-1.0 (b, 240H, *H37-H33*); 1.5-1.0 (b, 240H, *H23-H19*); 0.87 (bt, 108H, *H38*, *H31*, *H24*).  $^{13}C$ -NMR ( $CDCl_3$ , 75,47 MHz)  $\delta$  (ppm): 135 (*C9*, *C3*, *C7*, *C5*); 132 (*Cc*); 120 (*Ca*); 113 (*C2*); 112.5 (*C8*); 112 (*C6*, *C4*); 68.3 (*Cb*); 68.0-67.4 (*C25*, *C32*, *C18*); 31.9 (*C36*, *C29*, *C22*); 29.6 (*C26*); 29.4 (*C35*, *C28*, *C21*); 26.3 (*C27*); 26.0 (*C33*, *C20*, *C19*, *C34*); 22.7 (*C37*, *C30*, *C23*); 14.1 (*C38*, *C31*, *C24*). UV-vis ( $CHCl_3$ )  $\lambda$ /nm, log ( $\epsilon/M^{-1}cm^{-1}$ ) 424 (6.7) 522 (5.6) 580 (5.1). Fluorescence emission 610 nm (excitation at 424 nm).

### MALDI-tof spectrum of **3b**

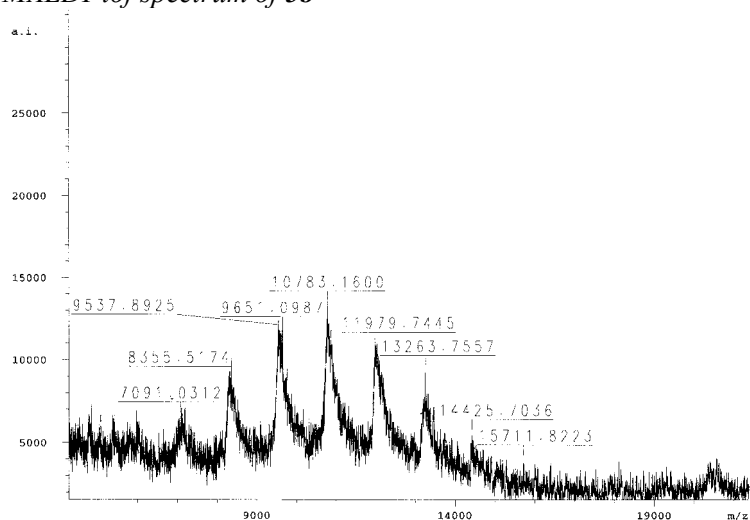

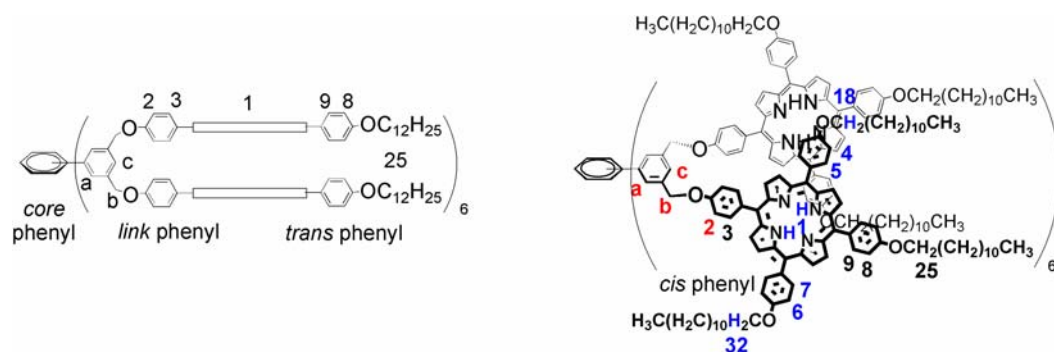

<sup>1</sup>H-NMR shifts (ppm) of **1**, **2b**, **3a** and **3b** and the  $\Delta\delta$  values

|                                    | <b>1</b> | <b>2b (OMe)</b> | <b>3a</b> | <b>3b</b>   | $\Delta\delta$ ( <b>3a-1</b> ) | $\Delta\delta$ ( <b>3a-2b</b> ) |
|------------------------------------|----------|-----------------|-----------|-------------|--------------------------------|---------------------------------|
| <b>NH H1</b>                       | -2.65    | -               | -2.78     | -           | -0.13                          | -                               |
| <b>Core Ha</b>                     | -        | 6.83 (6.70)     | 7.59      | 7.62        | -                              | +0.76 (+0.89)                   |
| <b>Core Hc</b>                     | -        | 6.90 (6.61)     | 8.03      | 7.99        | -                              | +1.13 (+1.43)                   |
| <b>Benzyl Hb</b>                   | -        | 4.17 (3.99)     | 5.3       | 5.3         | -                              | +1.13 (+1.31)                   |
| <b>link phenyl H2</b>              | 6.86     | -               | 7.2       | 7.23        | +0.34                          | -                               |
| <b>link phenyl H3</b>              | 7.91     | -               | 8.0       | 7.97        | +0.09                          | -                               |
| <b>Cis phenyl H4/H6</b>            | 7.14     | -               | 5.9/ 6.4  | 6.1 / 6.5   | -1.24/ -0.74                   | -                               |
| <b>Cis phenyl H5/H7</b>            | 8.01     | -               | 7.0 / 7.4 | 7.16 / 7.51 | -1.01/ -0.61                   | -                               |
| <b>trans phenyl H8</b>             | 7.17     | -               | 7.2       | 7.22        | +0.03                          | -                               |
| <b>trans phenyl H9</b>             | 8.04     | -               | 8.0       | 7.97        | -0.04                          | -                               |
| <b>OCH<sub>2</sub> cis H18/H32</b> | 4.11     | -               | 2.7 / 3.2 | 3.0 / 3.4   | -1.43 / -0.91                  | -                               |
| <b>OCH<sub>2</sub> trans H25</b>   | 4.13     | -               | 4.22      | 4.24        | +0.11                          | -                               |

UV/Vis-spectrum of **3a** and reference porphyrin **4**

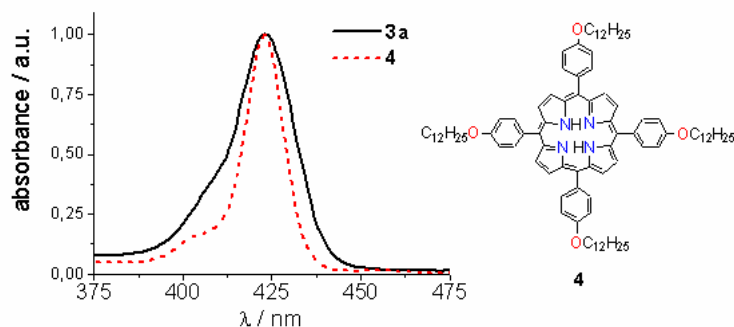

Experimental procedure for UV/Vis- and <sup>1</sup>H-NMR titrations of **3b** with DABCO

For the UV/Vis-titration a stock solution A of **3b** in chloroform (0.14  $\mu$ M) was prepared. This stock solution was used to make a solution B of DABCO in 40-fold excess (5.4  $\mu$ M) with respect to **3b**. Aliquots of 10, 25 and 50  $\mu$ L of solution B were added to 1.40 mL of solution A in a quartz cuvette and the UV/Vis-absorption spectrum was recorded after each addition on a Varian Cary 50 spectrophotometer.

For the <sup>1</sup>H-NMR titration 5.4 mg (0.35  $\mu$ mol) of **3b** was dissolved in 500  $\mu$ L of CDCl<sub>3</sub> (0.69 mM). To this solution, aliquots of 10  $\mu$ L of a DABCO solution in CDCl<sub>3</sub> (3.9 mg in 1 mL) were added, each corresponding to 1 equiv. of DABCO with respect to **3b**. <sup>1</sup>H-NMR spectra were recorded after each addition on a Bruker AMX 500 MHz instrument.

STM procedure

STM measurements were carried out in the constant current mode using a home-built low-current STM. For each experiment the HOPG surface was freshly cleaved and the STM tips were mechanically cut from a Pt:Ir (80:20) wire. A drop of a nearly saturated solution of molecules or complexes in 1-phenyloctane was brought to the surface. Typically, an STM image (1024 lines  $\times$  1024 points) was recorded over a period of 10 minutes. All STM experiments were carried out at least in

duplicate, and the raw data were processed only by the application of a background flattening. Before and after the experiments the piezo was calibrated *in situ* by lowering the bias voltage to 100 mV and raising the tunnelling current to 50 pA, which allowed imaging of the HOPG surface underneath the molecules.
